# Supplementary material for: Composition Profiling and Authenticity Assessment of Camellia Oil Using High Field and Low Field 1H NMR
Source: MDPI journal article supplement (doi:10.3390/molecules26164738), 2021-08-05
Supplement: s1 [file s1]

## Supplementary Material

### Composition Profiling and Authenticity Assessment of Camellia Oil Using High Field and Low Field $^1\text{H}$ NMR

Meijun Xing <sup>1+</sup>, Shenghao Wang <sup>1+</sup>, Jianzhong Lin <sup>2</sup>, Feng Xia <sup>1</sup>, Jianghua Feng <sup>1</sup>, and  
Guiping Shen <sup>1, \*</sup>

<sup>1</sup> Department of Electronic Science, Fujian Provincial Key Laboratory of Plasma and Magnetic Resonance, Xiamen University, Xiamen 361005, China;

<sup>2</sup> Inspection and quarantine Technology Center of Xiamen, Xiamen 361012, China;

<sup>+</sup> These authors contributed equally to this study.

\* Correspondence:

<sup>1</sup> 422 Siming South Road, Xiamen University, Xiamen, Fujian Province 361005, China.

Tel.: +86-592-2180728, Fax: +86-592-2181812.

Email address: gpshen@xmu.edu.cn (G. Shen)

Submitted to: *Molecules*

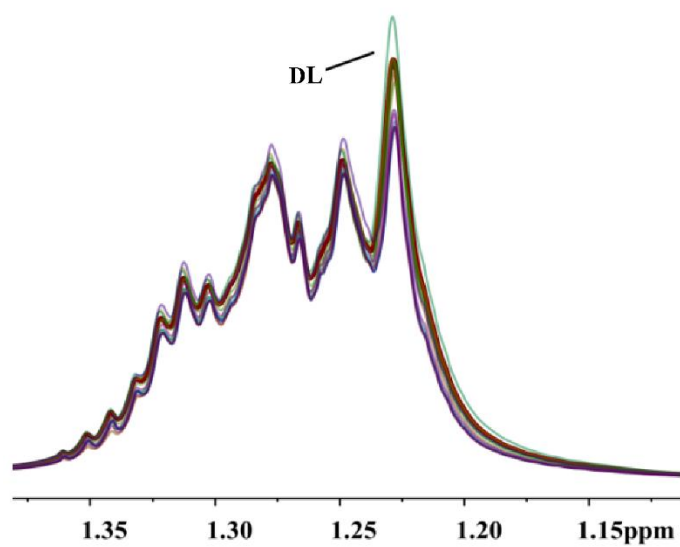

(a)

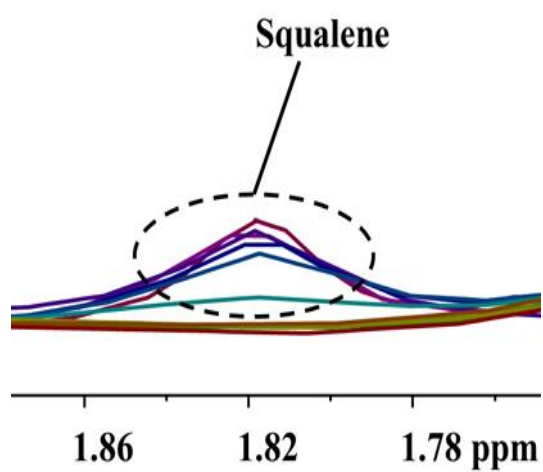

(b)

**Figure S1** The superimposed NMR spectra in the characteristic spectral regions of camellia oil (CA) and olive oil (OL).

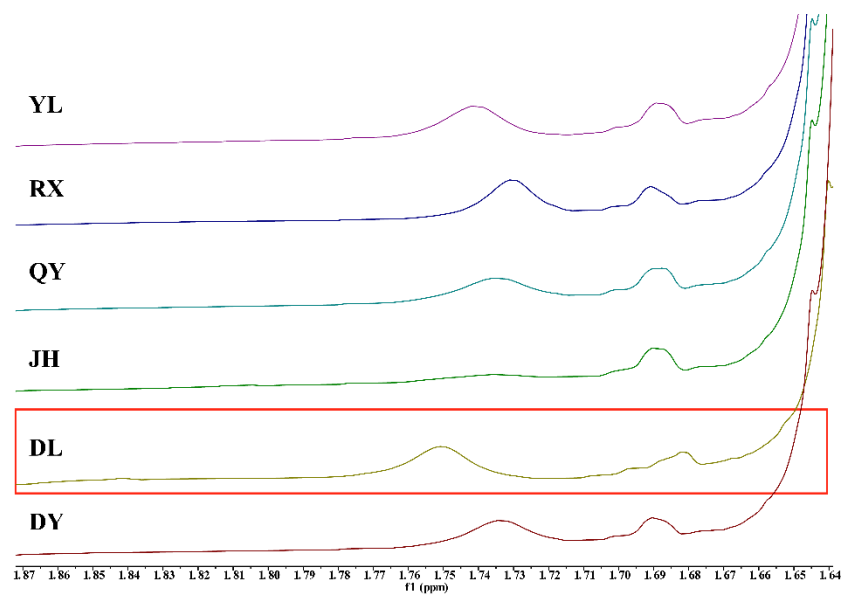

**Figure S2** The partial spectrum of different brands of CA

**Table S1** Assignment and spectral information of NMR spectral of camellia oil and olive oil

| Peak No | Chemical shift ppm (multiplicity) | Proton                                                                   | Assignment                            |
|---------|-----------------------------------|--------------------------------------------------------------------------|---------------------------------------|
| 1       | 0.81 (m)                          | H- <u>24,30,29</u>                                                       | $\beta$ -sitosterol                   |
| 2(A)    | 0.88 (br)                         | CH <sub>2</sub> CH <sub>2</sub> CH <sub>2</sub> - <u>CH</u> <sub>3</sub> | All fatty acids<br>(Except linolenic) |
| 3(B)    | 0.97 (t)                          | CH = CH-CH <sub>2</sub> - <u>CH</u> <sub>3</sub>                         | Linolenic                             |
| 4       | 1.30 (br)                         | (CH <sub>2</sub> ) <sub>n</sub>                                          | All fatty acids                       |
| 5(C)    | 1.60 (br)                         | CH <sub>2</sub> -CH <sub>2</sub> -COO-                                   | All fatty acids                       |
| 6       | 1.68 (s)                          | OH                                                                       | Terpenes                              |
| 7       | 1.82 (s)                          | -CH <sub>3</sub>                                                         | Squalene                              |
| 8(D)    | 2.00 (q)                          | <u>CH</u> <sub>2</sub> -CH = CH                                          | Oleic                                 |
| 9(D)    | 2.05 (q)                          | <u>CH</u> <sub>2</sub> -CH = CH                                          | UFA(Except oleic)                     |
| 10      | 2.32 (m)                          | <u>CH</u> <sub>2</sub> -COO-                                             | All fatty acids                       |
| 11(E)   | 2.77 (t)                          | CH = CH- <u>CH</u> <sub>2</sub> -CH = CH                                 | UFA(Except linolenic)                 |
| 12(E)   | 2.81 (t)                          | CH = CH- <u>CH</u> <sub>2</sub> -CH = CH                                 | Linolenic                             |
| 13      | 3.73 (d)                          | - <u>CH</u> <sub>2</sub> OH                                              | sn-1,2-Diglycerides                   |
| 14(F)   | 4.14 (dd)                         | <u>CH</u> <sub>2</sub> -OCOR sn-1,3                                      | Triacylglycerols                      |
| 15      | 4.18 (dd)                         | <u>CH</u> <sub>2</sub> -OCOR, CH <sub>2</sub> OH sn-1,3                  | sn-1,2-diacylglycerols                |
| 16(F)   | 4.23 (dd)                         | <u>CH</u> <sub>2</sub> -OCOR sn-1,3                                      | sn-1,3-diacylglycerols                |
| 17(F)   | 4.31 (dd)                         | <u>CH</u> <sub>2</sub> -OCOR sn-1,3                                      | Triacylglycerols                      |
| 18(G)   | 4.37 (dd)                         | <u>CH</u> <sub>2</sub> -OCOR sn-1,3                                      | sn-1,3-diacylglycerols                |
| 19(I)   | 5.12 (m)                          | <u>CH</u> OH                                                             | sn-1,2-diacylglycerols                |
| 20      | 5.27 (m)                          | <u>CH</u> -OCOR                                                          | Triacylglycerols                      |
| 21(H)   | 5.35 (br)                         | <u>CH</u> <sub>2</sub> -CH = CH                                          | All UFA                               |

Note: The multiplicity of peaks: s, singlet; d, doublet; t, triplet; q, quartet; dd, double doublet; m, multiplet;

**Table S2** Basic information of the experimental oil samples

| Experiment contents                                                  | Types of edible Oil                     | Brands of edible oil | Numbers | Origins             | Types of edible oil | Brands of edible oil | Numbers | Origins |
|----------------------------------------------------------------------|-----------------------------------------|----------------------|---------|---------------------|---------------------|----------------------|---------|---------|
| Nutrient composition difference analysis and adulteration experiment | Camellia oil (Low temperature pressing) | DY                   | 1       | Bama, Guangxi       | Olive oil           | AN                   | 7       | Italy   |
|                                                                      |                                         | JH                   | 2       | Yongzhou, Hunan     |                     | AG                   | 8       | Greece  |
|                                                                      |                                         | QY                   | 3       | Hangzhou, Zhejiang  |                     | OG                   | 9       | Turkey  |
|                                                                      |                                         | RX                   | 4       | Yichun, Jiangxi     |                     | OV                   | 10      | Spain   |
|                                                                      |                                         | YL                   | 5       | Dabieshan, Anhui    |                     | DE                   | 11      | Spain   |
|                                                                      |                                         | DL                   | 6       | Shangrao, Jiangxi   |                     | QI                   | 12      | China   |
|                                                                      | Corn oil (Refine)                       | JY                   | 13      | Shenzhen, Guangzhou | -                   | -                    | -       | -       |

Note: No. 1-12 edible oil samples were used for high-field NMR component analysis and low-field NMR relaxation time distribution analysis; No. 13 corn oil was used to blend camellia oil to make adulterated samples.
